# Supplementary material for: Plasticity of Cu nanoparticles: Dislocation-dendrite-induced strain hardening and a limit for displacive plasticity
Source: publisher site journal article supplement (doi:10.3762/bjnano.4.17), 2013-03-07
Supplement: Additional file 3 [file 2190-4286-4-17-S3.pdf]

# **Supporting Information**

for

## **Plasticity of Cu nanoparticles: Dislocation dendrite induced strain hardening and a limit for displacive plasticity**

Antti Tolvanen\*<sup>1,2</sup> and Karsten Albe<sup>1</sup>

Address: <sup>1</sup>Technische Universität Darmstadt, Institut für Materialwissenschaft, Fachgebiet Materialmodellierung, Petersenstr. 32, 64287 Darmstadt, Germany and <sup>2</sup>Department of Physics, FIN-00014 University of Helsinki, PO Box 43, Helsinki, Finland.

Email: Antti Tolvanen\* - [tolvanen@mm.tu-darmstadt.de](mailto:tolvanen@mm.tu-darmstadt.de)

\* Corresponding author

**Simultaneous nucleation in different orientations of the system**

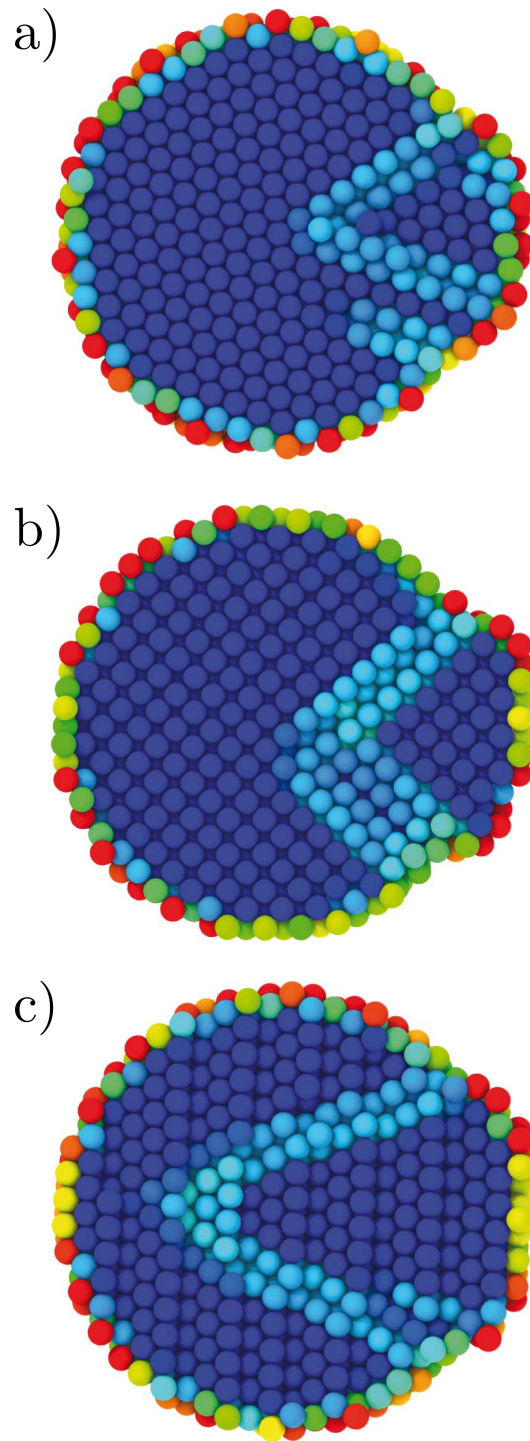

**Figure S1:** Simultaneous dislocation nucleation in different orientations of the system. a) Parallel, b) perpendicular, and c) tilted.
